# Supplementary material for: Hyperspectral Imaging to Study Dynamic Skin Perfusion after Injection of Articaine-4% with and without Epinephrine—Clinical Implications on Local Vasoconstriction
Source: MDPI journal article supplement (doi:10.3390/jcm10153411), 2021-07-31
Supplement: s1 [file s1]

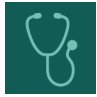

**Table S1.** Shows the means and standard deviations of StO<sub>2</sub> for each group, as well as the significance level within ROI-1 and ROI-2, and comparing the two (ROI-1 vs. 2) at Baseline. Significance is considered as  $p < 0.05$ .

| ROI         | Time point | Formulation | Mean (%) | SD±  | Mann-Whitney-Test (P-Value) |       |       |        |
|-------------|------------|-------------|----------|------|-----------------------------|-------|-------|--------|
|             |            |             |          |      | A100                        | A200  | Aw/o  | EPI200 |
| ROI-1       | Baseline   | A100        | 40.45    | 5.15 |                             |       |       |        |
|             |            | A200        | 40.27    | 6.19 | 0.82                        |       |       |        |
|             |            | Aw/o        | 40.11    | 5.77 | 0.432                       | 0.279 |       |        |
|             |            | EPI200      | 41.14    | 5.54 | 0.499                       | 0.352 | 0.874 |        |
| ROI-2       |            | A100        | 41.41    | 4.74 |                             |       |       |        |
|             |            | A200        | 40.31    | 6.71 | 0.213                       |       |       |        |
|             |            | Aw/o        | 42.09    | 4.86 | 0.192                       | 0.056 |       |        |
|             |            | EPI200      | 41.52    | 5.38 | 0.693                       | 0.246 | 0.535 |        |
| ROI-1 vs. 2 |            | A100        |          |      | 0.291                       |       |       |        |
|             |            | A200        |          |      |                             | 0.711 |       |        |
|             |            | Aw/o        |          |      |                             |       | 0.276 |        |
|             |            | EPI200      |          |      |                             |       |       | 0.634  |

**Table S2.** Shows the means and standard deviations of StO<sub>2</sub> for each group, as well as the significance level within ROI-1 and ROI-2, and comparing the two (ROI-1 vs. 2) at 30 sec. after injection. Significance is considered as  $p < 0.05$ .

| ROI         | Time point | Formulation | Mean (%) | SD±  | Mann-Whitney-Test (P-Value) |        |              |        |
|-------------|------------|-------------|----------|------|-----------------------------|--------|--------------|--------|
|             |            |             |          |      | A100                        | A200   | Articaine 4% | EPI200 |
| ROI-1       | 30 s       | A100        | 50.30    | 7.08 |                             |        |              |        |
|             |            | A200        | 49.29    | 6.64 | 0.754                       |        |              |        |
|             |            | Aw/o        | 57.76    | 5.77 | <0.001                      | <0.001 |              |        |
|             |            | EPI200      | 51.18    | 7.89 | 0.446                       | 0.273  | <0.001       |        |
| ROI-2       |            | A100        | 50,54    | 6,92 |                             |        |              |        |
|             |            | A200        | 48,95    | 7,76 | 0.377                       |        |              |        |
|             |            | Aw/o        | 54,19    | 5,23 | <0.001                      | <0.001 |              |        |
|             |            | EPI200      | 57,59    | 5,83 | <0.001                      | <0.001 | <0.011       |        |
| ROI-1 vs. 2 |            | A100        |          |      | 0.861                       |        |              |        |
|             |            | A200        |          |      |                             | 0.921  |              |        |
|             |            | Aw/o        |          |      |                             |        | 0.003        |        |
|             |            | EPI200      |          |      |                             |        |              | <0.001 |

**Table S3.** Shows the means and standard deviations of StO<sub>2</sub> for each group, as well as the significance level within ROI-1 and ROI-2, and comparing the two (ROI-1 vs. 2) at 1 and 2 min. after injection. Significance is considered as  $p < 0.05$ .

| ROI         | Time point | Formulation | Mean (%) | SD±  | Mann-Whitney-Test (P-Value) |        |        |        |
|-------------|------------|-------------|----------|------|-----------------------------|--------|--------|--------|
|             |            |             |          |      | A100                        | A200   | Aw/o   | EPI200 |
| ROI-1       | 1 min      | A100        | 48.72    | 7.59 |                             |        |        |        |
|             |            | A200        | 48.31    | 6.28 | 0.983                       |        |        |        |
|             |            | Aw/o        | 58.15    | 5.73 | <0.001                      | <0.001 |        |        |
|             |            | EPI200      | 49.71    | 8.14 | 0.385                       | 0.292  | <0.001 |        |
| ROI-2       |            | A100        | 49.05    | 6.64 |                             |        |        |        |
|             |            | A200        | 47.26    | 7.41 | 0.268                       |        |        |        |
|             |            | Aw/o        | 53.59    | 5.12 | <0.001                      | <0.001 |        |        |
|             |            | EPI200      | 57.18    | 6.14 | <0.001                      | <0.001 | <0.001 |        |
| ROI-1 vs. 2 |            | A100        |          |      | 0.726                       |        |        |        |
|             |            | A200        |          |      |                             | 0.482  |        |        |
|             |            | Aw/o        |          |      |                             |        | <0.001 |        |
|             |            | EPI200      |          |      |                             |        |        | <0.001 |
| ROI-1       | 2 min      | A100        | 47.91    | 8.16 |                             |        |        |        |
|             |            | A200        | 49.12    | 6.66 | 0.416                       |        |        |        |
|             |            | Aw/o        | 59.88    | 5.46 | <0.001                      | <0.001 |        |        |
|             |            | EPI200      | 44.72    | 8.61 | 0.385                       | 0.014  | <0.001 |        |
| ROI-2       |            | A100        | 47.44    | 6.75 |                             |        |        |        |
|             |            | A200        | 45.77    | 7.04 | 0.235                       |        |        |        |
|             |            | Aw/o        | 54.18    | 5.10 | <0.001                      | <0.001 |        |        |
|             |            | EPI200      | 54.97    | 6.52 | <0.001                      | <0.001 | 0.828  |        |
| ROI-1 vs. 2 |            | A100        |          |      | 0.808                       |        |        |        |
|             |            | A200        |          |      |                             | 0.065  |        |        |
|             |            | Aw/o        |          |      |                             |        | <0.001 |        |
|             |            | EPI200      |          |      |                             |        |        | <0.001 |

**Table S4.** Shows the means and standard deviations of StO<sub>2</sub> for each group, as well as the significance level within ROI-1 and ROI-2, and comparing the two (ROI-1 vs. 2) at 3, 4 and 5 min. after injection. Significance is considered as  $p < 0.05$ .

| ROI         | Time point | Formulation | Mean (%) | SD±   | Mann-Whitney-Test (P-Value) |        |        |        |
|-------------|------------|-------------|----------|-------|-----------------------------|--------|--------|--------|
|             |            |             |          |       | A100                        | A200   | Aw/o   | EPI200 |
| ROI-1       | 3 min      | A100        | 48.68    | 8.25  |                             |        |        |        |
|             |            | A200        | 50.44    | 6.70  | 0.232                       |        |        |        |
|             |            | Aw/o        | 62.30    | 5.50  | <0.001                      | <0.001 |        |        |
|             |            | EPI200      | 39.42    | 8.56  | <0.001                      | <0.001 | <0.001 |        |
| ROI-2       |            | A100        | 46.78    | 6.588 |                             |        |        |        |
|             |            | A200        | 45.79    | 7.483 | 0.569                       |        |        |        |
|             |            | Aw/o        | 55.50    | 4.951 | <0.001                      | <0.001 |        |        |
|             |            | EPI200      | 51.59    | 7.092 | <0.001                      | <0.001 | <0.001 |        |
| ROI-1 vs. 2 |            | A100        |          |       | 0.196                       |        |        |        |
|             |            | A200        |          |       |                             | <0.001 |        |        |
|             |            | Aw/o        |          |       |                             |        | <0.001 |        |
|             |            | EPI200      |          |       |                             |        |        | <0.001 |
| ROI-1       | 4 min      | A100        | 49.55    | 8.00  |                             |        |        |        |
|             |            | A200        | 51.42    | 7.09  | 0.207                       |        |        |        |
|             |            | Aw/o        | 64.39    | 5.14  | <0.001                      | <0.001 |        |        |
|             |            | EPI200      | 35.31    | 8.51  | <0.001                      | <0.001 | <0.001 | <0.001 |
| ROI-2       |            | A100        | 46.56    | 6.61  |                             |        |        |        |
|             |            | A200        | 45.99    | 7.67  | 0.910                       |        |        |        |

|                             |            |             |          |      |        |        |        |        |
|-----------------------------|------------|-------------|----------|------|--------|--------|--------|--------|
|                             |            | Aw/o        | 56.98    | 5.15 | <0.001 | <0.001 |        |        |
|                             |            | EPI200      | 47.61    | 8.18 | 0.480  | 0.398  | <0.001 |        |
| ROI-1 vs. 2                 |            | A100        |          |      | 0.029  |        |        |        |
|                             |            | A200        |          |      |        | <0.001 |        |        |
|                             |            | Aw/o        |          |      |        |        | <0.001 |        |
|                             |            | EPI200      |          |      |        |        |        | <0.001 |
| Mann-Whitney-Test (P-Value) |            |             |          |      |        |        |        |        |
| ROI                         | Time point | Formulation | Mean (%) | SD±  | A100   | A200   | Aw/o   | EPI200 |
| ROI-1                       | 5 min      | A100        | 50.08    | 7.97 |        |        |        |        |
|                             |            | A200        | 52.04    | 7.54 | 0.190  |        |        |        |
|                             |            | Aw/o        | 65.88    | 5.07 | <0.001 | <0.001 |        |        |
|                             |            | EPI200      | 31.65    | 8.40 | <0.001 | <0.001 | <0.001 |        |
| ROI-2                       |            | A100        | 45.65    | 6.48 |        |        |        |        |
|                             |            | A200        | 45.94    | 7.95 | 0.426  |        |        |        |
|                             |            | Aw/o        | 57.97    | 5.35 | <0.001 | <0.001 |        |        |
|                             |            | EPI200      | 43.98    | 8.42 | 0.154  | 0.040  | <0.001 |        |
| ROI-1 vs. 2                 |            | A100        |          |      | <0.001 |        |        |        |
|                             |            | A200        |          |      |        | <0.001 |        |        |
|                             |            | Aw/o        |          |      |        |        | <0.001 |        |
|                             |            | EPI200      |          |      |        |        |        | <0.001 |

**Table S5.** Shows the means and standard deviations of StO<sub>2</sub> for each group, as well as the significance level within ROI-1 and ROI-2, and comparing the two (ROI-1 vs. 2) at 15 min. after injection. Significance is considered as p<0.05.

| Mann-Whitney-Test (P-Value) |            |             |          |      |        |        |        |        |
|-----------------------------|------------|-------------|----------|------|--------|--------|--------|--------|
| ROI                         | Time point | Formulation | Mean (%) | SD±  | A100   | A200   | Aw/o   | EPI200 |
| ROI-1                       | 15 min     | A100        | 47.14    | 8.20 |        |        |        |        |
|                             |            | A200        | 51.19    | 8.22 | 0.011  |        |        |        |
|                             |            | Aw/o        | 67.31    | 5.12 | <0.001 | <0.001 |        |        |
|                             |            | EPI200      | 17.38    | 7.25 | <0.001 | <0.001 | <0.001 |        |
| ROI-2                       |            | A100        | 39.76    | 6.20 |        |        |        |        |
|                             |            | A200        | 41.31    | 8.06 | 0.041  |        |        |        |
|                             |            | Aw/o        | 58.60    | 6.47 | <0.001 | <0.001 |        |        |
|                             |            | EPI200      | 24.63    | 6.96 | <0.001 | <0.001 | <0.001 |        |
| ROI-1 vs. 2                 |            | A100        |          |      | <0.001 |        |        |        |
|                             |            | A200        |          |      |        | <0.001 |        |        |
|                             |            | Aw/o        |          |      |        |        | <0.001 |        |
|                             |            | EPI200      |          |      |        |        |        | <0.001 |

**Table S6.** Shows the means and standard deviations of StO<sub>2</sub> for each group, as well as the significance level within ROI-1 and ROI-2, and comparing the two (ROI-1 vs. 2) at 30 min. after injection. Significance is considered as p<0.05.

| ROI         | Time point | Formulation | Mean (%) | SD±  | Mann-Whitney-Test (P-Value) |        |        |        |
|-------------|------------|-------------|----------|------|-----------------------------|--------|--------|--------|
|             |            |             |          |      | A100                        | A200   | Aw/o   | EPI200 |
| ROI-1       | 30 min     | A100        | 40.59    | 7.77 |                             |        |        |        |
|             |            | A200        | 41.90    | 8.37 | 0.258                       |        |        |        |
|             |            | Aw/o        | 61.17    | 6.11 | <0.001                      | <0.001 |        |        |
|             |            | EPI200      | 20.43    | 6.89 | <0.001                      | <0.001 | <0.001 |        |
| ROI-2       |            | A100        | 34.545   | 4.73 |                             |        |        |        |
|             |            | A200        | 33.61    | 6.18 | 0.238                       |        |        |        |
|             |            | Aw/o        | 54.71    | 6.85 | <0.001                      | <0.001 |        |        |
|             |            | EPI200      | 22.02    | 6.19 | <0.001                      | <0.001 | <0.001 |        |
| ROI-1 vs. 2 |            | A100        |          |      | <0.001                      |        |        |        |
|             |            | A200        |          |      |                             | <0.001 |        |        |
|             |            | Aw/o        |          |      |                             |        | <0.001 |        |
|             |            | EPI200      |          |      |                             |        |        | 0.366  |

**Table S7.** Shows the means and standard deviations of StO<sub>2</sub> for each group, as well as the significance level within ROI-1 and ROI-2, and comparing the two (ROI-1 vs. 2) at 45 min. after injection. Significance is considered as p<0.05.

| ROI         | Time point | Formulation | Mean (%) | SD±  | Mann-Whitney-Test (P-Value) |        |        |        |
|-------------|------------|-------------|----------|------|-----------------------------|--------|--------|--------|
|             |            |             |          |      | A100                        | A200   | Aw/o   | EPI200 |
| ROI-1       | 45 min     | A100        | 33.72    | 7.09 |                             |        |        |        |
|             |            | A200        | 33.95    | 7.31 | 0.517                       |        |        |        |
|             |            | Aw/o        | 54.79    | 6.58 | <0.001                      | <0.001 |        |        |
|             |            | EPI200      | 26.39    | 7.19 | <0.001                      | <0.001 | <0.001 |        |
| ROI-2       |            | A100        | 30.34    | 4.34 |                             |        |        |        |
|             |            | A200        | 28.80    | 5.65 | 0.046                       |        |        |        |
|             |            | Aw/o        | 50.02    | 6.63 | <0.001                      | <0.001 |        |        |
|             |            | EPI200      | 26.73    | 6.30 | <0.001                      | 0.048  | <0.001 |        |
| ROI-1 vs. 2 |            | A100        |          |      | 0.003                       |        |        |        |
|             |            | A200        |          |      |                             | <0.001 |        |        |
|             |            | Aw/o        |          |      |                             |        | <0.001 |        |
|             |            | EPI200      |          |      |                             |        |        | 0.563  |

**Table S8.** Shows the means and standard deviations of StO<sub>2</sub> for each group, as well as the significance level within ROI-1 and ROI-2, and comparing the two (ROI-1 vs. 2) at 60 min. after injection. Significance is considered as p<0.05.

| ROI         | Time point | Formulation | Mean (%) | SD±  | Mann-Whitney-Test (P-Value) |        |        |        |
|-------------|------------|-------------|----------|------|-----------------------------|--------|--------|--------|
|             |            |             |          |      | A100                        | A200   | Aw/o   | EPI200 |
| ROI-1       | 60 min     | A100        | 29.96    | 6.06 |                             |        |        |        |
|             |            | A200        | 29.65    | 5.96 | 0.907                       |        |        |        |
|             |            | Aw/o        | 48.16    | 6.48 | <0.001                      | <0.001 |        |        |
|             |            | EPI200      | 26.38    | 6.02 | <0.001                      | 0.009  | <0.001 |        |
| ROI-2       |            | A100        | 29.03    | 4.25 |                             |        |        |        |
|             |            | A200        | 26.79    | 5.07 | <0.001                      |        |        |        |
|             |            | Aw/o        | 44.83    | 5.21 | <0.001                      | <0.001 |        |        |
|             |            | EPI200      | 27.12    | 5.63 | 0.013                       | 0.895  | <0.001 |        |
| ROI-1 vs. 2 |            | A100        |          |      | 0.617                       |        |        |        |
|             |            | A200        |          |      |                             | 0.002  |        |        |
|             |            | Aw/o        |          |      |                             |        | 0.009  |        |
|             |            | EPI200      |          |      |                             |        |        | 0.549  |

**Table S9.** Shows the means and standard deviations of StO<sub>2</sub> for each group, as well as the significance level within ROI-1 and ROI-2, and comparing the two (ROI-1 vs. 2) at 120 min. after injection. Significance is considered as p<0.05.

| ROI         | Time point | Formulation | Mean (%) | SD±  | Mann-Whitney-Test (P-Value) |        |        |        |
|-------------|------------|-------------|----------|------|-----------------------------|--------|--------|--------|
|             |            |             |          |      | A100                        | A200   | Aw/o   | EPI200 |
| ROI-1       | 120 min    | A100        | 26.08    | 3.85 |                             |        |        |        |
|             |            | A200        | 23.95    | 4.37 | 0.006                       |        |        |        |
|             |            | Aw/o        | 35.97    | 5.87 | <0.001                      | <0.001 |        |        |
|             |            | EPI200      | 25.29    | 4.87 | 0.264                       | 0.103  | <0.001 |        |
| ROI-2       |            | A100        | 28.51    | 3.52 |                             |        |        |        |
|             |            | A200        | 26.26    | 4.51 | <0.001                      |        |        |        |
|             |            | Aw/o        | 37.73    | 4.20 | <0.001                      | <0.001 |        |        |
|             |            | EPI200      | 30.68    | 5.02 | 0.005                       | <0.001 | <0.001 |        |
| ROI-1 vs. 2 |            | A100        |          |      | <0.001                      |        |        |        |
|             |            | A200        |          |      |                             | <0.001 |        |        |
|             |            | Aw/o        |          |      |                             |        | 0.108  |        |
|             |            | EPI200      |          |      |                             |        |        | <0.001 |
